**Extinction-resistant attention to long-term conditioned threat is indexed by selective  
visuocortical alpha suppression in humans**

Christian Panitz<sup>a</sup> (christian.panitz@staff.uni-marburg.de)\*,

Andreas Keil<sup>b</sup> (akeil@ufl.edu),

&

Erik M. Mueller<sup>a</sup> (erik.mueller@staff.uni-marburg.de)

<sup>a</sup>University of Marburg, Department of Psychology, Gutenbergstr. 18, 35032 Marburg, Germany

<sup>b</sup>University of Florida, Center for the Study of Emotion and Attention, 3063 Longleaf Road,  
Gainesville, FL 32608, USA

\*Correspondence concerning this article should be addressed to Christian Panitz, Department  
of Psychology, University of Marburg, Gutenbergstr. 18, 35032 Marburg, Germany.

E-mail: christian.panitz@staff.uni-marburg.de

1 **Abstract**

2

3 While ERP studies have shown heightened early visual attention to conditioned threat, it is unknown  
4 whether this attentional prioritization is sustained throughout later processing stages and whether it is  
5 robust to extinction. To investigate sustained visual attention, we assessed visuocortical alpha  
6 suppression in response to conditioned and extinguished threat. We reanalysed data from  $N = 87$  male  
7 participants that had shown successful long-term threat conditioning and extinction in self reports and  
8 physiological measures in a two-day conditioning paradigm. The current EEG time-frequency  
9 analyses on recall test data on Day 2 revealed that previously threat-conditioned vs. safety cues  
10 evoked stronger occipital alpha power suppression from 600 to 1200 ms. Notably, this suppression  
11 was resistant to previous extinction. The present study showed for the first time that threat  
12 conditioning enhances sustained modulation of visuocortical attention to threat in the long term. Long-  
13 term stability and extinction resistance of alpha suppression suggest a crucial role of visuocortical  
14 attention mechanisms in the maintenance of learned fears.

15

16 Keywords: threat; long-term conditioning; long-term extinction; alpha; visual attention

17

18

## 1 **Introduction**

2 Learning to predict threat and safety based on environmental cues is fundamental for adaptive  
3 behaviour. A well-established paradigm for elucidating mechanisms of associative cue-outcome  
4 learning is classical threat conditioning (also fear/aversive conditioning) where conditioned stimuli are  
5 threat cues (CS+) when they signal an upcoming aversive event (unconditioned stimulus; US) and  
6 safety cues (CS-) when they signal the absence of an aversive event<sup>1,2</sup>. The acquired conditioned  
7 defensive response to the CS+ is expected to diminish again upon extinction training, i.e., repeated  
8 presentation of CS+ without US<sup>3</sup>.

9 Importantly, both conditioning and extinction memories need to be consolidated, retained, and  
10 recalled in future situations to allow adaptive responding in the long term. Successful short-term  
11 learning – i.e., acquisition and extinction of a conditioned response within an experimental session – is  
12 considered necessary but not sufficient for successful long-term learning. Such long-term learning  
13 effects are indicated by the successful recall of previously acquired and extinguished contingencies in  
14 a delayed test session<sup>3</sup>. Importantly, acquisition and extinction learning form separate memory traces  
15 and individuals may recall previously acquired threat memories without recalling extinction  
16 memories. In other words, they may show long-term extinction resistance, which is assumed to be key  
17 in the maintenance of fears<sup>4</sup>. In this case, despite repeated omission of aversive events, individuals  
18 keep showing robust conditioned threat responses over time.

19 Conditioned threat responses have different functions and manifest at various levels of central  
20 and autonomic physiology. Among these, increased attentive processing promotes capture of threat-  
21 relevant information, improving chances of successful defensive responding<sup>5</sup>. Supporting this notion,  
22 studies using visual evoked brain potentials in humans have found selectively heightened visual  
23 attention when viewing threat cues<sup>6-11</sup>. However, because visual evoked potentials to threat generally  
24 reflect early brain activity (i.e. < 500 ms)<sup>12</sup>, it is unknown, whether enhanced visual attention is  
25 sustained throughout later visual processing stages. Moreover, it is unclear, if heightened attention  
26 displays long-term resistance to extinction. These are clinically relevant questions given that enduring  
27 prioritization of threat processing may interfere with fear reduction through extinction and exposure

1 therapy. The present study addressed these questions using a robust electrophysiological marker of  
2 sustained visual attention, suppression of visuocortical oscillatory activity in the alpha range.

3 Alpha oscillations (e.g., 8-12 Hz)<sup>13,14</sup> indicate inhibition processes in neural populations<sup>15,16</sup>.  
4 Visually evoked posterior alpha suppression has been associated with increased excitability of early  
5 visual areas in the occipital cortex<sup>17-20</sup> in response to increased attentional demands<sup>21-24</sup>. Moreover,  
6 posterior alpha power suppression has been found stronger in response to aversive vs.  
7 neutral/appetitive pictures<sup>13,25,26</sup> (but also see<sup>27</sup>), taken to reflect prioritized visual processing of threat  
8 information<sup>5</sup>.

9 In the present study, we reanalysed data from  $N = 87$  participants that previously had shown  
10 successful long-term threat conditioning and extinction of CS ratings, evoked heart period and skin  
11 conductance responses assessed in a two-day differential threat conditioning paradigm with threat  
12 acquisition and extinction on one day and a critical recall test one day later<sup>28</sup>. For the current analyses,  
13 we estimated current source density of alpha-band activity at scalp sites consistent with visuocortical  
14 sources, to investigate (a) whether heightened visuocortical alpha suppression indexes selective visual  
15 attention to threat cues one day after conditioning, and (b) if conditioned alpha suppression is  
16 extinguished in the long term. For this purpose, we compared alpha power changes in response to  
17 previously extinguished vs. non-extinguished CS during the Day 2 recall test.

18

## 1 Results

### 2 Conditioning and extinction effects during Day 2 recall test

3 Means (and standard deviations) of alpha power percent change for the different CS types  
4 were as follows – CS+E: -4.47 (12.53), CS+N: -4.09 (12.95), CS-E: -1.17 (12.86), CS-N: -2.25  
5 (14.84). The ANOVA showed a significant main effect of Contingency ( $F(1, 86) = 9.85, p = .002, \eta_p^2$   
6  $= .103$ ) as CS+ were followed by a stronger suppression of alpha power compared to CS- (also see  
7 Figure 1). Meanwhile, the main effect Extinction ( $F(1, 86) = 0.18, p = .669, \eta_p^2 = .002$ ) and the  
8 Contingency x Extinction interaction ( $F(1, 86) = 1.29, p = .259, \eta_p^2 = .015$ ) were not significant.

9 In line with the frequentist ANOVA, Bayesian ANOVA provided strongest evidence for a  
10 main effect of Contingency in the absence of other effects ( $BF_{10} = 26.0$ , all other models:  $BF_{10} < 3.3$ ).  
11 In line with this pattern, Bayesian inclusion factors provided support for the inclusion of the main  
12 effect of Contingency ( $BF_{Incl} = 25.9$ ) and against the inclusion of the main effect of Extinction ( $BF_{Incl}$   
13  $= 1 / 8.1$ ) or the Contingency x Extinction interaction ( $BF_{Incl} = 1 / 4.0$ ). Figure 2 shows time-frequency  
14 plots and topographic mapping of the Contingency effect on alpha power.

15

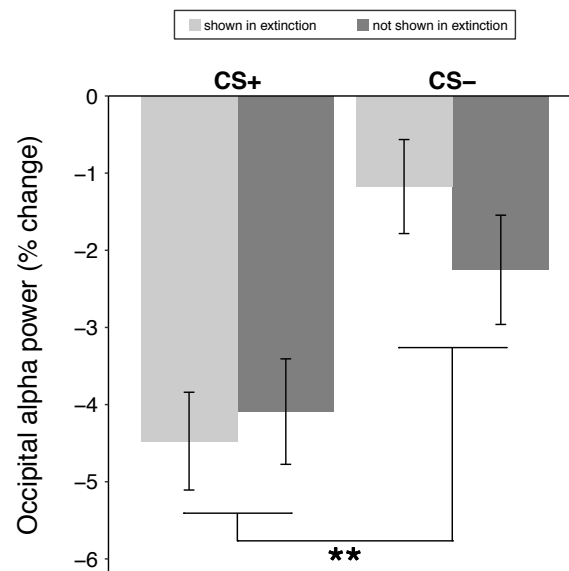

16

17 **Figure 1. Conditioning effects on Day 2 alpha power.** Mean alpha power (relative to baseline) at occipital  
18 sites in the time window of 500 – 1200 ms. Light bars represent CS presented during Day 1 extinction, dark bars  
19 represent CS not presented during Day 1 extinction. Error bars indicate SEM based on within-subject variance.  
20 \*\* $p < .01$  for the main effect of Contingency.

21

22

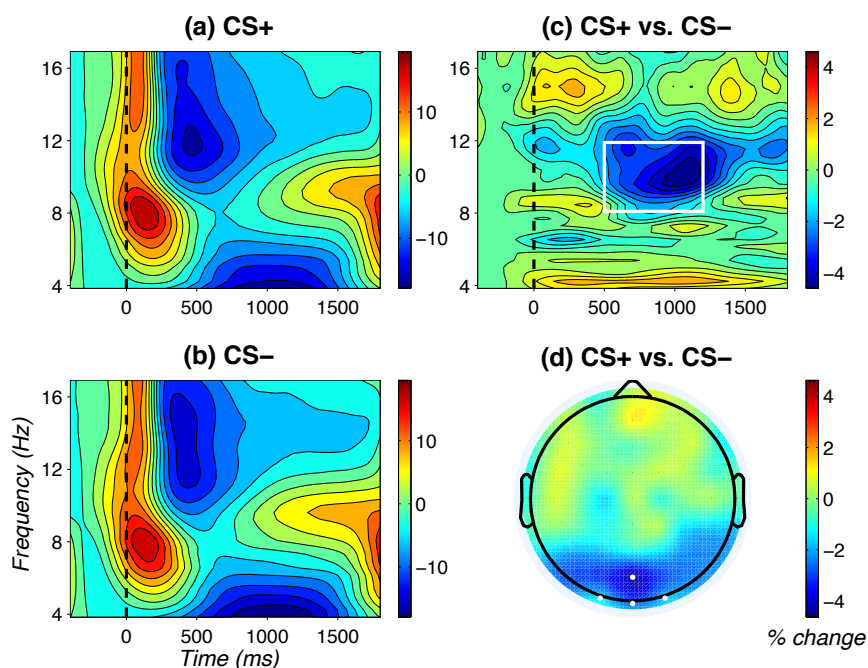

1  
2 **Figure 2. Main effect of Contingency on occipital alpha power.** (a) and (b) Time-frequency plots for CS+ and  
3 CS-, respectively. Power values are % change relative to baseline (-400 to -200 ms) and averaged across Oz,  
4 POz, O1, and O2. (c) Time-frequency plot of the difference between CS+ and CS-, across Oz, POz, O1, and O2;  
5 the white rectangle indicates time (500 to 1200 ms) and frequency (8.1 to 11.9 Hz) windows for statistical  
6 analyses. (d) Topography of the difference between CS+ and CS- in the a priori defined time window (500 to  
7 1200 ms). White dots depict the electrodes used for statistical analyses.  
8

9  
10 *Time course of Contingency effect*

11 As suggested by permutation *t*-tests, viewing CS+ compared to CS- prompted significantly  
12 lower alpha power in the time window from 630 to 1230 ms post-CS (Figure 3), largely converging  
13 with our a priori window (500 to 1200 ms).  
14

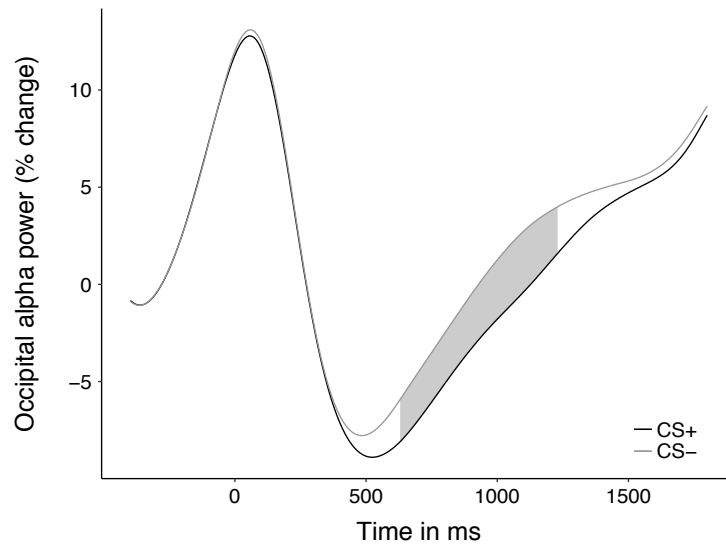

1

2 **Figure 3. Time course of Contingency effect on mean occipital alpha power.** Alpha power (relative to  
3 baseline) for collapsed CS+ and CS-, respectively, averaged across occipital sites. The grey-shaded area  
4 indicates significant differences between CS+ and CS- as determined by permutation testing ( $p < .05$ , two-  
5 sided).

6

7

## 1 **Discussion**

2           In the present study, we investigated the role of heightened selective attention to threat cues in  
3 long-term threat conditioning and extinction. For this purpose, participants underwent a differential  
4 threat conditioning paradigm with acquisition and extinction on Day 1 and a test phase on Day 2 that  
5 allowed to assess long-term recall of extinguished and non-extinguished threat-conditioned responses.  
6 We found that, one day after threat conditioning, CS evoked a suppression of alpha power at occipital  
7 sites between 600 and 1200 ms, which was more pronounced for threat cues (i.e., CS+) compared to  
8 safety cues (i.e., CS-). Importantly, this conditioning effect was unaffected by Day 1 extinction  
9 training.

10           In the present sample, we observed robust alpha power suppression at occipital electrodes that  
11 was stronger for threat-conditioned CS+ than for CS-. This is the first time that occipital alpha power  
12 suppression is shown in response to conditioned threat cues. The present effects converge with  
13 previously shown alpha suppression to naturally threatening stimuli<sup>13,25,26</sup> and can be interpreted as  
14 stronger disinhibition of early visuocortical areas facilitating attentional prioritization of behaviourally  
15 more relevant (i.e., threat) cues<sup>22,24</sup>. They are also consistent with previous ERP research showing  
16 threat-related prioritization of visuocortical processing<sup>6-11,29,30</sup>. Prioritization of threat is highly  
17 important for the successful choice of adaptive responding<sup>5,31</sup>, given limited capacities for information  
18 processing in the brain<sup>32,33</sup>.

19           Threat-potentiated alpha suppression was found in the time window from about 600 to 1200  
20 ms post-CS. Therefore, this alpha suppression likely indicates *sustained* attention allocation to the  
21 threat cue via recruitment of visuocortical resources<sup>13</sup>. This process may be initiated after initial  
22 stimulus recognition and affective stimulus categorization as presumably indicated by early event-  
23 related potential<sup>12,34</sup> and may reflect a more thorough analysis of threat cues. Taken together, the  
24 present results suggest occipital alpha as a promising new marker of sustained visuocortical attention  
25 modulation in response to conditioned threat cues.

26           Importantly, the stronger alpha suppression in response to CS+ was evident one day after  
27 initial learning, indicating successful long-term recall of selectively increased attention allocation to  
28 threat cues. To our knowledge, this is the first study to show such long-term threat conditioning effects



1 on selective visual attention, stable across timely spaced situations. The long-term stability of the  
2 present alpha suppression suggests selective attention modulation in threat as a central feature of  
3 stable fear. While there is some evidence that selective attention to threatening information contributes  
4 to the long-term maintenance of fear<sup>35,36</sup>, the neural underpinnings of this link are not well understood.  
5 The present study suggests a mechanism in which differential activation of visuocortical areas is a  
6 temporally stable threat-conditioned response and underlies increased attentional processing of threat  
7 cues across time. Increased attentional threat processing may consolidate fearful behaviour via  
8 increased levels of state fear<sup>36</sup> and by a reduced ability to disengage from threat cues at the cost of  
9 other potentially relevant stimuli<sup>37-39</sup> – e.g., concurrent safety cues or cues for successful coping.  
10 Moreover, attentional biases may interact with negative expectancy, memory, and interpretation biases  
11 related to threat<sup>40</sup>. Future studies may use occipital alpha to investigate these and other potential  
12 mechanisms in order to elucidate attentional mechanisms of long-term fear maintenance.

13 In addition to long-term threat recall, we observed long-term extinction resistance of threat-  
14 conditioned alpha suppression. In other words, the initially threat-conditioned CS+ continued to evoke  
15 conditioned threat responses on Day 2, regardless of Day 1 fear extinction. The conclusion of  
16 extinction resistance was backed by Bayesian analyses, which favoured models excluding the  
17 extinction factor. Note that the present result pattern of extinction-resistant alpha suppression mirrors  
18 the pattern of long-term extinction-resistance of (a) rapid processing enhancements of threat-  
19 conditioned faces<sup>30</sup> and (b) cardiac deceleration in the present sample<sup>28</sup> as well as in previous  
20 studies<sup>41,42</sup>. Threat-evoked cardiac deceleration has been suggested to also reflect attentional  
21 processes, namely orienting in the face of imminent harm<sup>43-45</sup>. On the other hand, the present sample  
22 showed reduced differential skin conductance responses for extinguished (CS+E vs. CS-E) compared  
23 to non-extinguished (CS+N vs. CS-N) threat cues<sup>28</sup>, which indicates successful extinction recall of  
24 CS-US contingency awareness<sup>46</sup>. This suggests that attention-related processes in general, and  
25 occipital alpha suppression in particular, could be more extinction-resistant than other conditioned  
26 responses and may occur in a better-safe-than-sorry fashion. In other words, the cost of increased  
27 attentional engagement to invalid threat cues (i.e., false alarms) may be judged as significantly smaller  
28 than the cost for overlooking valid threat cues – even after repeated omission of harmful events.

1           As discussed earlier, alpha-related attentional processes may be crucial in the long-term  
2 maintenance of fears. The observed extinction resistance in the present study suggests that former  
3 threat cues continue drawing on attentional resources even in the absence of contingent reinforcement  
4 by harmful outcomes, i.e., even when cues are not followed by negative consequences anymore after  
5 initial learning. Moreover, occipital alpha suppression may prove useful for investigating the influence  
6 of threat-focused attention and attentional biases on the effectiveness of exposure therapy<sup>47,48</sup>.

7           The limitations of the current study should be addressed. First, using the current paradigm, it  
8 cannot be ruled out that CS+ evoked stronger alpha suppression than CS- due to partial reinforcement  
9 and changing contingencies across phases, making predictions of US occurrence more difficult in CS+  
10 vs. CS- and motivating participants to process CS+ more thoroughly. This, however, is unlikely to  
11 explain the present effects given that threat-depicting pictures, with no learning history, also evoked  
12 stronger alpha suppression in previous studies<sup>13,25,26,49</sup>. Second, we only used male participants in order  
13 to investigate conditioning and extinction without the influence of known sex differences<sup>50</sup>. As there  
14 also may be gender differences in visuocortical threat processing<sup>51,52</sup>, the present results should be  
15 replicated in females.

16           In the present study, we could show that conditioned visual threat cues evoke enhanced alpha  
17 suppression at occipital sites. Moreover, we showed for the first time that increased attention  
18 allocation to conditioned threat cues via sustained recruitment of early visuocortical areas is long-term  
19 stable and resistant to extinction. Future studies may use occipital alpha power to further elucidate  
20 mechanisms of visual attention in the development, maintenance, and extinction of fears.

21

1 **Methods**

2 *Sample*

3 We analysed data of a sample of  $N = 87$  healthy, male participants (mean age: 23.7, SD: 3.85, range:  
4 18-34), described in more detail elsewhere<sup>28</sup>. Participants were compensated 65 € (ca. 75 US\$) for two  
5 experimental sessions (total 7 hours on two subsequent days). The study was conducted in accordance  
6 to the Declaration of Helsinki and was approved by the ethics committee of the German Psychological  
7 Association (DGPs). Informed consent was obtained from all participants at the beginning of the  
8 experiment.

9

10 *Experimental Design*

11 *Conditioning and Extinction paradigm.* We employed a two-day differential threat  
12 conditioning and extinction paradigm<sup>28,53</sup> (also see Figure 4). Briefly, on Day 1, participants  
13 underwent CS habituation, followed by an acquisition phase. Two CS (CS+E, CS+N) were paired  
14 with a US in 21 out of 45 trials (46.6 %), the other two CS (CS-E, CS-N) were never paired with the  
15 US (also 45 trials per CS). The extinction phase started exactly three hours after the end of acquisition  
16 and consisted of 40 CS+E and CS-E presentations ('E' standing for *presented during extinction*  
17 *phase*). CS+N, CS-N, and US were not presented during the extinction phase ('N' standing for *not*  
18 *presented during extinction phase*). Approximately 24 h after the extinction, participants returned for a  
19 Day 2 recall test which included 60 trials of each CS. No US were presented on Day 2.

20 *Stimuli and trial structure.* We used four different male faces with neutral expression from the  
21 Karolinska Directed Emotional Faces set<sup>54</sup> as CS (pictures: AM10NES, AM13NES, AM31NES,  
22 BM08NES; also see Figure 4). Assignment of face stimuli to the different CS types was permuted  
23 and balanced across participants. The US was a 1 s white noise burst at 95 dB(A) delivered by a room  
24 speaker as we had previously shown that noise bursts are particularly well suited for threat  
25 conditioning with many trials<sup>42</sup>. In every trial, a fixation cross (1 s duration) was presented before  
26 participants saw the CS for 4 s. In paired trials the CS co-terminated with the US for 1 s. A black  
27 screen (jittered duration, 6-8 s) was presented between trials.

28

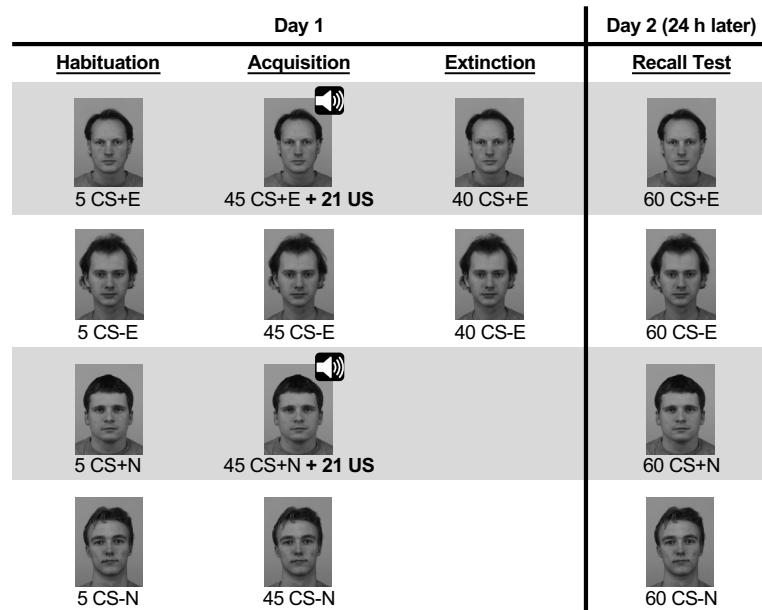

1

2 **Figure 4. Conditioning and extinction paradigm.** Face stimuli and number of presentations in the two-day  
3 differential threat conditioning and extinction paradigm. The US was only presented during acquisition,  
4 indicated by the speaker symbol. Assignment of different faces to CS type was permuted across participants.  
5 CS+E = extinguished CS+, CS+N = non-extinguished CS+, CS-E = CS- presented during extinction phase, CS-  
6 N = CS- not presented during extinction phase. Stimuli were presented in colour. KDEF stimuli IDs from top to  
7 bottom: AM10NES, AM13NES, AM31NES, BM08NES. Figure from <sup>28</sup>.

8

9

#### 10 *EEG recording and preprocessing*

11 64-channel EEG was recorded with a QuickAmp72 amplifier and actiCAP active electrodes  
12 (Brain Products, Gilching, Germany) at 1000 Hz, with a 200 Hz online lowpass-filter and referenced  
13 against the average. EEG processing was performed in BrainVision Analyzer 2 (Brain Products,  
14 Gilching, Germany). The EEG was downsampled to 500 Hz, highpass-filtered (-3 dB at 0.1 Hz, 24  
15 dB/oct., zero-phase IIR Butterworth filter) and notch-filtered (50 Hz, 5 Hz bandwidth, 16th order).  
16 Extended Infomax ICA<sup>55</sup> was applied to the continuous data. Critical independent components  
17 reflective of horizontal and vertical eye movements, blinks, and cardiac artefacts were identified and  
18 removed by an experienced rater. To increase signal stationarity required for ICA, large EEG artefacts  
19 were removed manually, the signal was 0.5 Hz highpass-filtered for ICA only and the resulting  
20 weights were subsequently applied to the 0.1 Hz filtered data<sup>56</sup>. Segments with remaining artefacts  
21 were removed manually and channels with excessive amounts of bad data were interpolated (spline  
22 interpolation). Continuous EEG data were lowpass-filtered (30 Hz, filter specifications identical to

1 highpass filter). After correcting marker latencies for monitor delay (33 ms), data were segmented  
2 relative to CS onset (-600 to 2000 ms).

3 To estimate current source density and improve the spatial specificity of the voltage map, the  
4 surface Laplacian was computed<sup>57</sup> as implemented in BrainVision Analyzer 2 (spline order: 4,  
5 Legendre polynomial: 10, lambda: 1e-5). In order to facilitate comparison with previous studies, we  
6 also analysed the average-referenced scalp data. The results converged with the present results in the  
7 surface Laplacian data and are provided as supplementary material in the Open Science Framework  
8 (OSF) repository<sup>58</sup>.

9

#### 10 *Wavelet analyses*

11 Wavelet analyses were conducted in MATLAB 2013a (MathWorks, Natick, MA, USA) using  
12 established custom scripts<sup>59</sup>. First, EEG segments in the time domain were baseline-corrected  
13 (subtraction of the mean from -600 to -500 ms) and tapered with a cosine square window (20 samples  
14 rise/fall). Complex Morlet wavelets were applied with variable bandwidths (Morlet parameter =  $f/\sigma_f =$   
15 12) to compute power for frequency bands from 3.8 to 30.4 Hz in linear steps of 0.38 Hz. Power in  
16 each frequency band was baseline-corrected by dividing the signal by the mean amplitude between -  
17 400 ms and -200 ms relative to CS onset. Mean power of all discrete frequencies from 8.1 Hz to 11.9  
18 Hz<sup>13,14</sup> was used for statistical analyses on alpha.

19

#### 20 *Statistical analyses*

21 Statistical analyses were performed with R<sup>60</sup> in the RStudio environment<sup>61</sup>. In order to assess  
22 the influence of Day 1 learning on occipital alpha during Day 2, we computed mean alpha power  
23 across Oz and adjacent electrodes (Oz, POz, O1, and O2) in the time window of 500 – 1200 ms<sup>26,62</sup>  
24 after the CS. The resulting values were entered into an ANOVA with the within-subject factors  
25 Contingency (CS+ vs. CS-) and Extinction (extinguished vs. non-extinguished) using the *aov* function  
26 in R. Type I error level was set to  $\alpha = .05$ . Distribution of mean alpha power across participants was  
27 sufficiently close to a normal distribution as indicated by low values of skewness and kurtosis for all  
28 CS types ( $|\text{skewness}| \leq 0.46$ ,  $|\text{kurtosis}| \leq 1.12$ )<sup>63</sup>. In addition to null-hypothesis testing, we conducted

1 Bayesian analyses as implemented in the *anovaBF* function in the BayesFactor package<sup>64</sup> for R. We  
2 computed Bayes factors (100,000 iterations) for four different models (main effect Contingency only,  
3 main effect Extinction only, additive model of Contingency + Extinction main effects, complete model  
4 including both main effects and the interaction term<sup>65</sup>) compared to the null model ( $BF_{10}$ ). All models  
5 had equal prior probabilities and included a random effect term to account for between-subject  
6 variance. In a second step, we computed Bayesian inclusion factors ( $BF_{Incl}$ ) for each effect (i.e.,  
7 Contingency, Extinction, and Contingency x Extinction) that indicate whether models including this  
8 effect are more likely to explain the data than matched models without this effect. More precisely, all  
9 models containing the effect of interest – but no higher-order interactions of this effect – were  
10 compared to matched models stripped of the effect (BAWS factor suggested by Sebastiaan Mathôt;  
11 also implemented in JASP 0.9<sup>66</sup>). As an example, for the Contingency effect, the models *Contingency*  
12 *only* and *Contingency + Extinction* were compared to the null model and the *Extinction only* model.

13 After using a predefined time window (500 to 1200 ms) for hypothesis testing, we conducted  
14 follow-up analyses on the exact time window of the Contingency effect based on the present data. We  
15 used permutation-controlled *t*-tests (adapted from the  $t_{max}$  approach from Blair and Karniski<sup>67</sup>),  
16 comparing alpha power (averaged across Oz, POz, O1, O2) at each time sample between both CS+  
17 and both CS- (i.e., Contingency contrast). First, we randomly permuted the CS+ and CS- condition  
18 in each participant 1,000 times and computed *t*-values for each of the 1,300 time samples. Then, the  
19 tails of each permutation's *t*-value distribution were determined and stored in a  $t_{min}$  and  $t_{max}$   
20 distribution, respectively, each having 1,000 values corresponding to the 1,000 permutations. Finally,  
21 2.5<sup>th</sup> and 97.5<sup>th</sup> percentiles from the resulting distribution of  $t_{min}$  and  $t_{max}$  values were used as critical *t*-  
22 values to compare empirical *t*-values against (i.e.,  $\alpha = .05$ , two-sided;  $t_{crit}$ : CS+ < CS-: -2.59; CS+ >  
23 CS-: 2.64).

24

25

1 **Data availability**

2 Data and R scripts for statistical analyses as well as preprocessed single-trial EEG data of the current  
3 study are available in the Open Science Framework (OSF) repository, [osf.io/bfqjc](https://osf.io/bfqjc).

4

## 1 **References**

- 2 1. Lonsdorf, T. B. *et al.* Don't fear 'fear conditioning': Methodological considerations for the  
3 design and analysis of studies on human fear acquisition, extinction, and return of fear.  
4 *Neurosci. Biobehav. Rev.* **77**, 247–285 (2017).
- 5 2. Rescorla, R. A. & Wagner, A. R. A theory of Pavlovian conditioning: Variations in the  
6 effectiveness of reinforcement and nonreinforcement. in *Classical conditioning II: Current*  
7 *research and theory* (eds. Black, A. H. & Prokasy, W. F.) 64–99 (Appleton-Century-Crofts,  
8 1972).
- 9 3. Myers, K. M. & Davis, M. Mechanisms of fear extinction. *Mol. Psychiatry* **12**, 120–150  
10 (2007).
- 11 4. Milad, M. R. & Quirk, G. J. Fear Extinction as a Model for Translational Neuroscience: Ten  
12 Years of Progress. *Annu. Rev. Psychol.* **63**, 129–151 (2012).
- 13 5. Lang, P. J. & Bradley, M. M. Emotion and the motivational brain. *Biol. Psychol.* **84**, 437–450  
14 (2010).
- 15 6. Bublatzky, F. & Schupp, H. T. Pictures cueing threat: Brain dynamics in viewing explicitly  
16 instructed danger cues. *Soc. Cogn. Affect. Neurosci.* **7**, 611–622 (2012).
- 17 7. Kastner-Dorn, A. K., Andreatta, M., Pauli, P. & Wieser, M. J. Hypervigilance during anxiety  
18 and selective attention during fear: Using steady-state visual evoked potentials (ssVEPs) to  
19 disentangle attention mechanisms during predictable and unpredictable threat. *Cortex* **106**,  
20 120–131 (2018).
- 21 8. Michalowski, J. M., Pané-Farré, C. A., Löw, A. & Hamm, A. O. Brain dynamics of visual  
22 attention during anticipation and encoding of threat- and safe-cues in spider-phobic individuals.  
23 **10**, 1177–1186 (2015).
- 24 9. Wieser, M. J., Reicherts, P., Juravle, G. & von Leupoldt, A. Attention mechanisms during  
25 predictable and unpredictable threat — A steady-state visual evoked potential approach.  
26 *Neuroimage* **139**, 167–175 (2016).
- 27 10. Gruss, L. F., Langae, T. & Keil, A. The role of the COMT val158met polymorphism in  
28 mediating aversive learning in visual cortex. *Neuroimage* **125**, 633–642 (2016).



- 1 11. Muench, H. M., Westermann, S., Pizzagalli, D. A., Hofmann, S. G. & Mueller, E. M. Self-  
2 relevant threat contexts enhance early processing of fear-conditioned faces. *Biol. Psychol.* **121**,  
3 194–202 (2016).
- 4 12. Miskovic, V. & Keil, A. Acquired fears reflected in cortical sensory processing: A review of  
5 electrophysiological studies of human classical conditioning. *Psychophysiology* **49**, 1230–1241  
6 (2012).
- 7 13. de Cesarei, A. & Codispoti, M. Affective modulation of the LPP and  $\alpha$ -ERD during picture  
8 viewing. *Psychophysiology* **48**, 1397–1404 (2011).
- 9 14. Bartsch, F., Hamuni, G., Miskovic, V., Lang, P. J. & Keil, A. Oscillatory brain activity in the  
10 alpha range is modulated by the content of word-prompted mental imagery. *Psychophysiology*  
11 **52**, 727–735 (2015).
- 12 15. Klimesch, W., Sauseng, P. & Hanslmayr, S. EEG alpha oscillations: The inhibition-timing  
13 hypothesis. *Brain Res. Rev.* **53**, 63–88 (2007).
- 14 16. Pfurtscheller, G. Functional brain imaging based on ERD / ERS. *Vision Res.* **41**, 1257–1260  
15 (2001).
- 16 17. Green, J. J. *et al.* Cortical and Subcortical Coordination of Visual Spatial Attention Revealed  
17 by Simultaneous EEG–fMRI Recording. *J. Neurosci.* **37**, 7803–7810 (2017).
- 18 18. Scheeringa, R., Koopmans, P. J., van Mourik, T., Jensen, O. & Norris, D. G. The relationship  
19 between oscillatory EEG activity and the laminar-specific BOLD signal. *Proc. Natl. Acad. Sci.*  
20 **113**, 6761–6766 (2016).
- 21 19. Iemi, L., Chaumon, M., Crouzet, S. M. & Busch, N. A. Spontaneous Neural Oscillations Bias  
22 Perception by Modulating Baseline Excitability. *J. Neurosci.* **37**, 807–819 (2017).
- 23 20. Iemi, L. & Busch, N. A. Moment-to-Moment Fluctuations in Neuronal Excitability Bias  
24 Subjective Perception Rather than Strategic Decision-Making. *eNeuro* **5**, 1–13 (2018).
- 25 21. Klimesch, W. Alpha-band oscillations, attention, and controlled access to stored information.  
26 *Trends Cogn. Sci.* **16**, 606–617 (2012).
- 27 22. Foxe, J. J. & Snyder, A. C. The role of alpha-band brain oscillations as a sensory suppression  
28 mechanism during selective attention. *Front. Psychol.* **2**, 154 (2011).

- 1 23. Ben-Simon, E. *et al.* The dark side of the alpha rhythm: FMRI evidence for induced alpha  
2 modulation during complete darkness. *Eur. J. Neurosci.* **37**, 795–803 (2013).
- 3 24. Frey, J. N., Ruhnau, P. & Weisz, N. Not so different after all: The same oscillatory processes  
4 support different types of attention. *Brain Res.* **1626**, 183–197 (2015).
- 5 25. Huster, R. J., Stevens, S., Gerlach, A. L. & Rist, F. A spectralanalytic approach to emotional  
6 responses evoked through picture presentation. *Int. J. Psychophysiol.* **72**, 212–216 (2009).
- 7 26. Vagnoni, E., Lourenco, S. F. & Longo, M. R. Threat modulates neural responses to looming  
8 visual stimuli. *Eur. J. Neurosci.* **42**, 2190–2202 (2015).
- 9 27. Uusberg, A., Uibo, H., Kreegipuu, K. & Allik, J. EEG alpha and cortical inhibition in affective  
10 attention. *Int. J. Psychophysiol.* **89**, 26–36 (2013).
- 11 28. Panitz, C. *et al.* Fearfulness, neuroticism/anxiety, and COMT Val158Met in long-term fear  
12 conditioning and extinction. *Neurobiol. Learn. Mem.* **155**, 7–20 (2018).
- 13 29. Thigpen, N. N., Bartsch, F. & Keil, A. The malleability of emotional perception: Short-term  
14 plasticity in retinotropic neurons accompanies the formation of perceptual biases to threat. *J.*  
15 *Exp. Psychol. Gen.* **146**, 464–471 (2017).
- 16 30. Mueller, E. M. & Pizzagalli, D. A. One-year-old fear memories rapidly activate human  
17 fusiform gyrus. *Soc. Cogn. Affect. Neurosci.* **11**, 308–316 (2016).
- 18 31. Bradley, M. M., Keil, A. & Lang, P. J. Orienting and emotional perception: facilitation,  
19 attenuation, and interference. *Front. Psychol.* **3**, 493 (2012).
- 20 32. Chun, M. M., Golomb, J. D. & Turk-Browne, N. B. A Taxonomy of External and Internal  
21 Attention. *Annu. Rev. Psychol.* **62**, 73–101 (2011).
- 22 33. Lavie, N. Distracted and confused?: Selective attention under load. *Trends Cogn. Sci.* **9**, 75–82  
23 (2005).
- 24 34. Schupp, H. T., Flaisch, T., Stockburger, J. & Junghöfer, M. Emotion and attention: event-  
25 related brain potential studies. *Prog. Brain Res.* **156**, 31–51 (2006).
- 26 35. Richards, H. J., Benson, V., Donnelly, N. & Hadwin, J. A. Exploring the function of selective  
27 attention and hypervigilance for threat in anxiety. *Clin. Psychol. Rev.* **34**, 1–13 (2014).
- 28 36. Van Bockstaele, B. *et al.* A Review of Current Evidence for the Causal Impact of Attentional

- 1 Bias on Fear and Anxiety. *Psychol. Bull.* **140**, 682–721 (2014).
- 2 37. Fox, E. *et al.* Attentional bias for threat: Evidence for delayed disengagement from emotional  
3 faces. *Cogn. Emot.* **16**, 355–379 (2002).
- 4 38. Georgiou, G. A. *et al.* Focusing on fear: Attentional disengagement from emotional faces. *Vis.*  
5 *cogn.* **12**, 145–158 (2005).
- 6 39. Rinck, M., Reinecke, A., Ellwart, T., Heuer, K. & Becker, E. S. Speeded Detection and  
7 Increased Distraction in Fear of Spiders: Evidence From Eye Movements. *J. Abnorm. Psychol.*  
8 **114**, 235–248 (2005).
- 9 40. Aue, T. & Okon-Singer, H. Expectancy biases in fear and anxiety and their link to biases in  
10 attention. *Clin. Psychol. Rev.* **42**, 83–95 (2015).
- 11 41. Panitz, C., Hermann, C. & Mueller, E. M. Conditioned and extinguished fear modulate  
12 functional corticocardiac coupling in humans. *Psychophysiology* **52**, 1351–1360 (2015).
- 13 42. Sperl, M. F., Panitz, C., Hermann, C. & Mueller, E. M. A pragmatic comparison of noise burst  
14 and electric shock unconditioned stimuli for fear conditioning research with many trials.  
15 *Psychophysiology* **53**, (2016).
- 16 43. Löw, A., Weymar, M. & Hamm, A. O. When Threat Is Near, Get Out of Here: Dynamics of  
17 Defensive Behavior During Freezing and Active Avoidance. *Psychol. Sci.* **26**, 1706–1716  
18 (2015).
- 19 44. Wendt, J., Löw, A., Weymar, M., Lotze, M. & Hamm, A. O. Active avoidance and attentive  
20 freezing in the face of approaching threat. *Neuroimage* **158**, 196–204 (2017).
- 21 45. Roelofs, K. Freeze for action: Neurobiological mechanisms in animal and human freezing.  
22 *Philos. Trans. R. Soc. B* **372**, 20160206 (2017).
- 23 46. Hamm, A. O. & Vaitl, D. Affective learning: Awareness and aversion. *Psychophysiology* **33**,  
24 698–710 (1996).
- 25 47. Barry, T. J., Vervliet, B. & Hermans, D. An integrative review of attention biases and their  
26 contribution to treatment for anxiety disorders. *Front. Psychol.* **6**, 968 (2015).
- 27 48. Mogg, K. & Bradley, B. P. Anxiety and Threat-Related Attention: Cognitive-Motivational  
28 Framework and Treatment. *Trends Cogn. Sci.* **22**, 225–240 (2018).

- 1 49. Güntekin, B. & Basar, E. Emotional face expressions are differentiated with brain oscillations.  
2 *Int. J. Psychophysiol.* **64**, 91–100 (2007).
- 3 50. Merz, C. J. *et al.* Neuronal correlates of extinction learning are modulated by sex hormones.  
4 *Soc. Cogn. Affect. Neurosci.* **7**, 819–830 (2012).
- 5 51. Pintzinger, N. M., Pfabigan, D. M., Pfau, L., Kryspin-Exner, I. & Lamm, C. Temperament  
6 differentially influences early information processing in men and women: Preliminary  
7 electrophysiological evidence of attentional biases in healthy individuals. *Biol. Psychol.* **122**,  
8 69–79 (2017).
- 9 52. Sass, S. M. *et al.* Time course of attentional bias in anxiety: Emotion and gender specificity.  
10 *Psychophysiology* **47**, 247–259 (2010).
- 11 53. Mueller, E. M., Panitz, C., Hermann, C. & Pizzagalli, D. A. Prefrontal Oscillations during  
12 Recall of Conditioned and Extinguished Fear in Humans. *J. Neurosci.* **34**, 7059–7066 (2014).
- 13 54. Lundqvist, D., Flykt, A. & Öhman, A. *The Karolinska Directed Emotional Faces - KDEF. CD*  
14 *ROM from the Department of Clinical Neuroscience, Psychology Section, Karolinska*  
15 *Institutet.* (1998).
- 16 55. Lee, T. W., Girolami, M. & Sejnowski, T. J. Independent component analysis using an  
17 extended infomax algorithm for mixed subgaussian and supergaussian sources. *Neural*  
18 *Comput.* **11**, 417–441 (1999).
- 19 56. Winkler, I., Debener, S., Muller, K.-R. & Tangermann, M. On the influence of high-pass  
20 filtering on ICA-based artifact reduction in EEG-ERP. in *2015 37th Annual International*  
21 *Conference of the IEEE Engineering in Medicine and Biology Society (EMBC)* 4101–4105  
22 (2015). doi:10.1109/EMBC.2015.7319296
- 23 57. Perrin, F., Pernier, J., Bertrand, O. & Echallier, J. F. Spherical splines for scalp potential and  
24 current density mapping. *Electroencephalogr. Clin. Neurophysiol.* **72**, 184–187 (1989).
- 25 58. Panitz, C., Keil, A. & Mueller, E. M. *Extinction-resistant attention to long-term conditioned*  
26 *threat is indexed by selective visuocortical alpha suppression - Open Data and Materials.*  
27 (Available at: [osf.io/bfqjc](https://osf.io/bfqjc), 2019).
- 28 59. Keil, A., Stolarova, M., Moratti, S. & Ray, W. J. Adaptation in human visual cortex as a

- 1 mechanism for rapid discrimination of aversive stimuli. *Neuroimage* **36**, 472–479 (2007).
- 2 60. R Core Team. *R: A Language and Environment for Statistical Computing*. (R Foundation for  
3 Statistical Computing, 2018).
- 4 61. RStudio Team. *RStudio: Integrated Development Environment for R*. (RStudio, Inc., 2016).
- 5 62. Chien, J. H. *et al.* Oscillatory EEG Activity Induced by Conditioning Stimuli During Fear  
6 Conditioning Reflects Salience and Valence of these Stimuli More than Expectancy.  
7 *Neuroscience* **346**, 81–93 (2018).
- 8 63. Curran, P. J., West, S. G. & Finch, J. F. The Robustness of Test Statistics to Nonnormality and  
9 Specification Error in Confirmatory Factor Analysis. *Psychol. Methods* **1**, 16–29 (1996).
- 10 64. Morey, R. D. & Rouder, J. N. BayesFactor: Computation of Bayes Factors for Common  
11 Designs. (2018).
- 12 65. Rouder, J. N., Engelhardt, C. R., McCabe, S. & Morey, R. D. Model comparison in ANOVA.  
13 *Psychon. Bull. Rev.* **23**, 1779–1786 (2016).
- 14 66. JASP Team. *JASP (Version 0.9)[Computer Software]*. (2018).
- 15 67. Blair, R. C. & Karniski, W. An alternative method for significance testing of waveform  
16 difference potentials. *Psychophysiology* **30**, 518–524 (1993).
- 17
- 18

## 1 **Acknowledgements**

2 This study was supported by a grant of the German Research Foundation to Erik M. Mueller [DFG  
3 MU3535/2-1].

4

1 **Author Contributions**

2 E.M.M. designed the research. C.P. collected the data. A.K. provided scripts for wavelet analyses.

3 C.P. conducted wavelet and statistical analyses. All authors interpreted the results. C.P. drafted the

4 manuscript and all authors edited the manuscript.

5

1 **Additional Information**

- 2 The authors declare no competing interests.
